# Supplementary material for: Hydroxyl-rich C-dots synthesized by a one-pot method and their application in the preparation of noble metal nanoparticles
Source: Royal Society of Chemistry journal article supplement (doi:10.1039/c5cc01771h), 2015-01-01
Supplement: c5cc01771h1.pdf [file c5cc01771h1.pdf]

## Supporting Information

# Hydroxyl-rich C-dots Synthesized with One-pot Method and Its Application in the Preparation of Nobel Metal Nanoparticles

Qiuju Lu, Jianhui Deng, Yuxin Hou, Haiyan Wang, Haitao Li, Youyu Zhang\* and Shouzhao Yao

*Key Laboratory of Chemical Biology and Traditional Chinese Medicine Research (Ministry of Education), College of Chemistry and Chemical Engineering, Hunan Normal University, Changsha 410081, PR China*

\*Corresponding author. Fax: +86 73188872531; Tel: +86 73188865515;

E-mail address: zhangyy@hunnu.edu.cn

## 1 Experimental

### 1.1 Materials

All chemicals were used as received without any further purification. Ultrapure water (18.2 mΩ; Millipore Co., USA) was used throughout the experiment.

### 1.2 Synthesis of C-dots

C-dots were electrochemically synthesized based on our previous work with a few modifications.<sup>1</sup> Briefly, ethylene glycol and sodium hydroxide mix solution was used as the electrolytes, platinum sheets as the positive and the negative electrodes. The C-dots were synthesized by electrolyzing electrolyte solution under 30 V (DC) for 40 min. After electrolysis, the electrolyte solution was neutralized with hydrochloric acid and then dialyzed (Mw 1000) against water for over two days.

### 1.3 Synthesis of AuNPs, AgNPs and Au@AgNPs

The AuNPs were synthesized as follows. A certain amount of HAuCl<sub>4</sub> aqueous solution (0.1 mM) was added to 1 mL aqueous solution of as-synthesized C-dots (0.07 mg mL<sup>-1</sup>) at room temperature for 20 min. Similarly, the syntheses of AgNPs were conducted in an aqueous solution consisting of C-dots (0.07 mg mL<sup>-1</sup>), AgNO<sub>3</sub> (0.1

mM) and NaOH (0.01 M) at room temperature for 18 min.

Au@AgNPs were synthesized using seed colloid technique. Using as-synthesized AuNPs as seeds, then different concentration of AgNO<sub>3</sub> and NaOH (0.01 M) solution were added to the seeds solution at room temperature for a certain time.

#### **1.4 Detection of H<sub>2</sub>O<sub>2</sub> and glucose**

The detection of H<sub>2</sub>O<sub>2</sub> is conducted by the following procedures: 100  $\mu$ L of the as-synthesized metal nanoparticles solution (0.5 mg mL<sup>-1</sup>) was added into 790  $\mu$ L NaAc buffer solution (50 mM, pH 4.0), followed by adding 10  $\mu$ L of TMB solution (50 mM in DMSO), then 100  $\mu$ L of H<sub>2</sub>O<sub>2</sub> solution with different concentrations was added, then kept in 37 °C bath for 30 min before absorbance measurement.

For the detection of glucose, 50  $\mu$ L of GOx (2 mg mL<sup>-1</sup>) and 50  $\mu$ L glucose with different concentrations were first incubated at 37 °C for 30 min. Afterward, 10  $\mu$ L of TMB, 100  $\mu$ L of metal nanoparticles solution (0.5 mg mL<sup>-1</sup>), and 790  $\mu$ L of NaAc solution were added, and the mixture was further incubated at 37 °C for another 30 min before absorbance measurement.

#### **1.5 Characterizations**

Transmission electron microscopy (TEM) images and selected area electron diffraction (SAED) pattern of C-dots were obtained using a JEOL-1230 transmission electron microscope (JEOL, Japan). The sample for TEM characterization was prepared by placing a drop of the colloidal solution on the carbon-coated copper grid and dried at room temperature. The Scanning transmission electron microscopy (STEM) image, elemental analysis mappings were taken by using a Tecnai G2 F20 S-T win HRTEM operated at 200 kV. Fourier transform infrared spectra (FT-IR) in the 4000 to 400 cm<sup>-1</sup> regions were recorded on a Nicolet Nexus 670 FT-IR spectroscope (Nicolet Instrument Co., USA). The UV-Vis spectra and the fluorescence spectra (FL) were obtained using a UV-2450 UV-Vis spectrophotometer (Shimadzu Co., Japan) and a F-4500 fluorescence spectrophotometer (Hitachi Ltd, Japan), respectively. X-ray photoelectron spectroscopy (XPS) analysis was done on an Thermo Fisher

Scientific K-Alpha 1063 X-ray photoelectron spectrometer (Thermo Fisher Scientific, Britain) using Al, K as the exciting source.

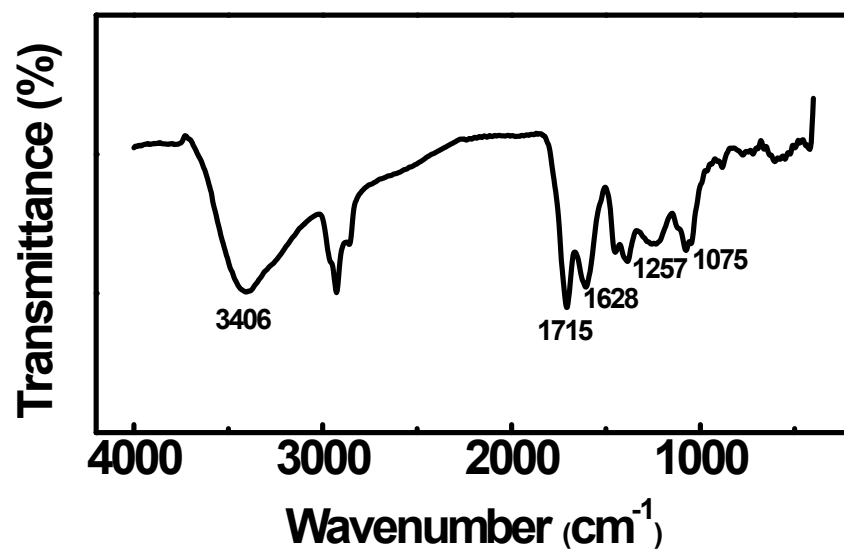

Fig. S1 FT-IR spectra of as-synthesized C-dots

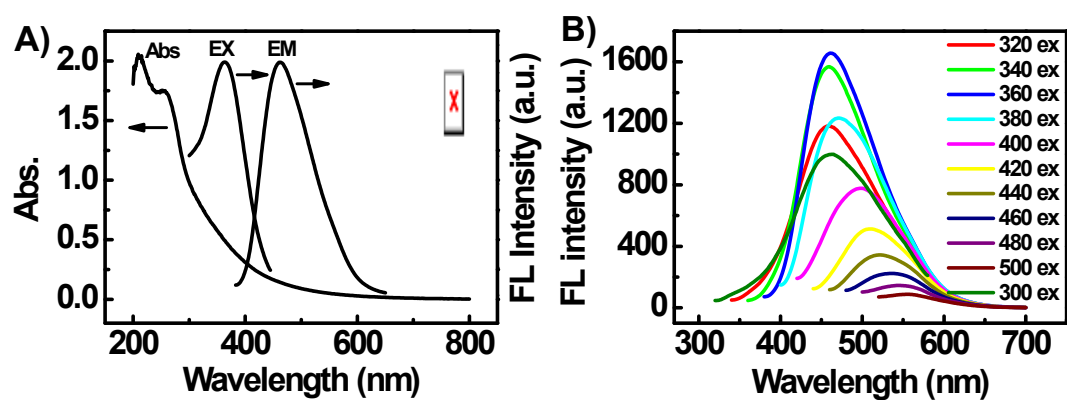

Fig. S2 (A) UV-vis spectra and FL spectra of C-dots, inset: the color of C-dots solution under UV irradiation. (B) FL emission spectra of C-dots at different excitation wavelengths.

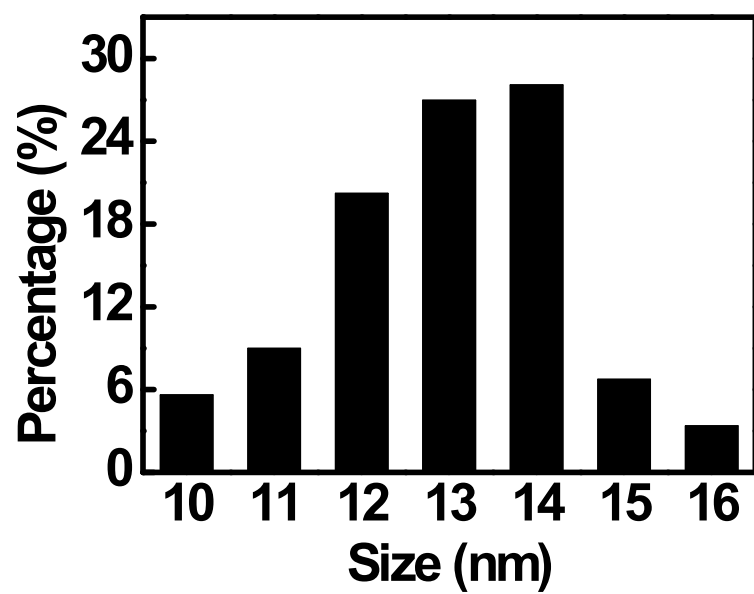

Fig. S3 Size distribution histograms of as-synthesized AuNPs.

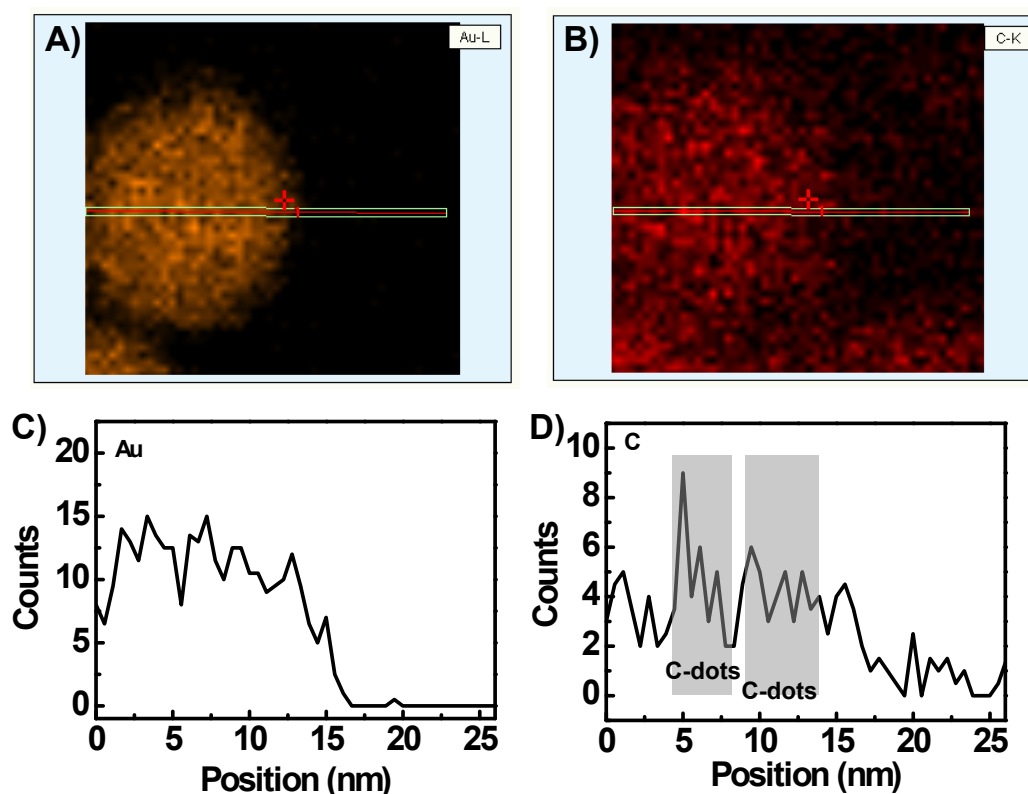

Fig. S4 (A, B)Elemental maps of Au-L and C-K respectively. (C, D) Corresponding Cross-sectional compositional line profiles of (A) and (B).

The STEM measured was performed by placing a drop of as-synthesized nanoparticles colloidal solution on the carbon-coated copper grid. In the absence of nanoparticles, the carbon signal was little low which was obtained from the carbon-coated copper grid. On the contrary, the presence of nanoparticles brought a higher carbon signal in the experiments (both carbon of carbon-coated copper grid and carbon of C-dots can cause of carbon signal). Also the higher signal width In Fig. S4 was the same large as the size of C-dots. In addition, there are many hydroxyl groups on the surface of the C-dots, which can interact with gold nanoparticles to protect AuNPs from aggregating. Thus, the increased signal indicated the presence of carbon on AuNPs surface.

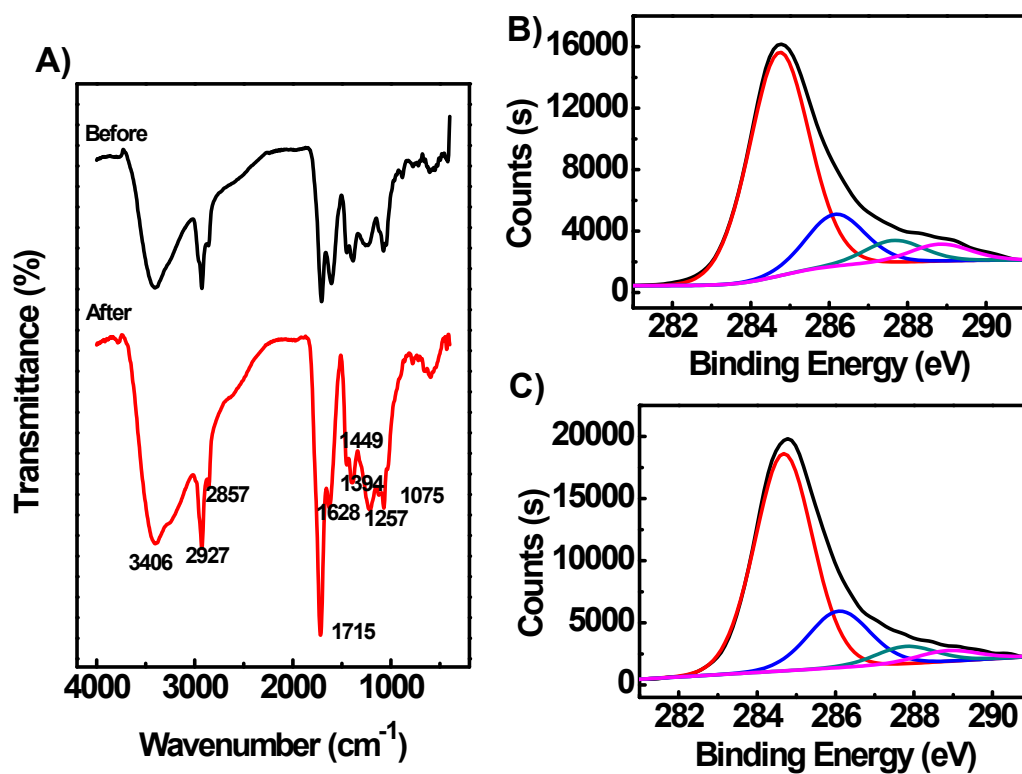

Fig. S5 (A) FT-IR spectra of C-dots before and after reduction. (B, C) C1s spectra of C-dots before (B) and after (C) reduction.



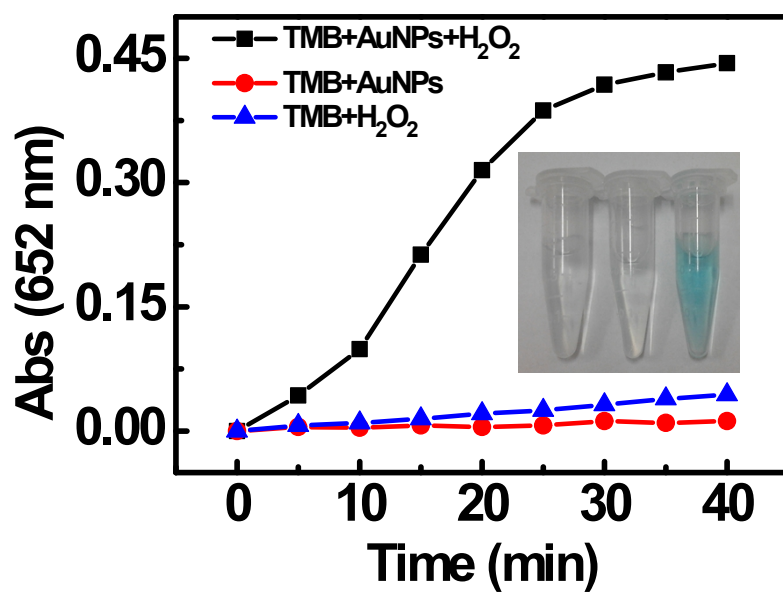

Fig. S6 Time-dependent absorbance changes of TMB at 652 nm in different assays. Inserts are the photograph of them: (from left to right) TMB-AuNPs, TMB-H<sub>2</sub>O<sub>2</sub> and TMB-AuNPs-H<sub>2</sub>O<sub>2</sub>, respectively. The pH of NaAc buffer was 4.0; the concentration of AuNPs was 0.05 mg mL<sup>-1</sup>. The concentration of TMB was 0.5 mM, and H<sub>2</sub>O<sub>2</sub> was 0.5 mM. Before absorbance test, all the samples were kept in 37 °C.

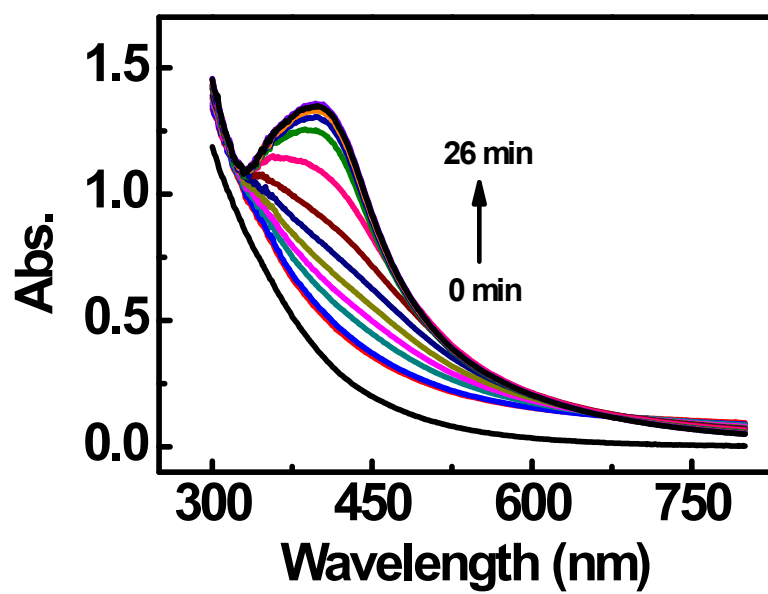

Fig. S7 Temporal evolution UV-vis spectra of C-dots and C-dots mixed with  $\text{AgNO}_3$  and  $\text{NaOH}$  (0.01 mM) under room temperature.

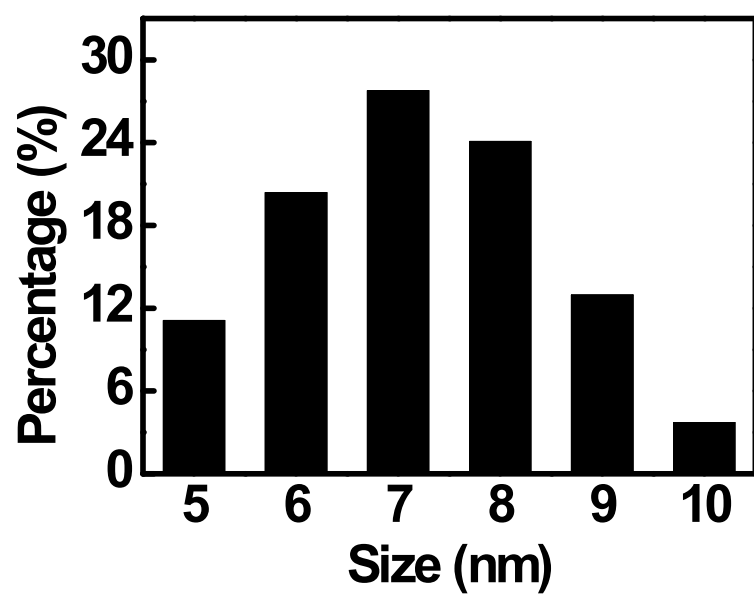

Fig. S8 Size distribution histograms of as-synthesized AgNPs.

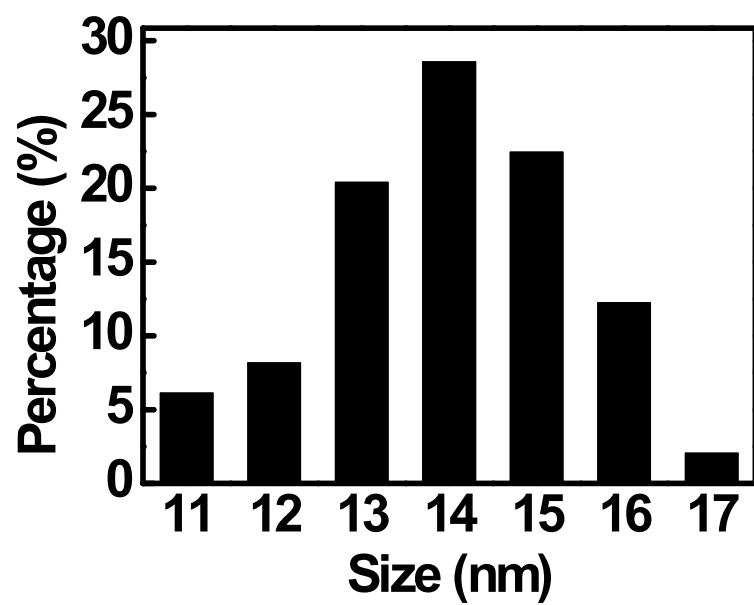

Fig. S9 Size distribution histograms of as-synthesized Au@AgNPs.

Tab S1

The changes of binding energy area of C-dots before and after reduction

| Binding Energy<br>(eV) | Area CPS.eV |              | Area Ratio |              |
|------------------------|-------------|--------------|------------|--------------|
|                        | C-dots      | AuNPs/C-dots | C-dots     | AuNPs/C-dots |
| 284.7 (C-C)            | 32989.99    | 28442.73     | 1.00       | 1.00         |
| 286.1 (C-OH)           | 9142.86     | 6443.99      | 0.28       | 0.23         |
| 287.8 (C=O)            | 2728.99     | 2719.44      | 0.08       | 0.10         |
| 289.0 (O=C-OH)         | 1713.95     | 2134.22      | 0.05       | 0.08         |

1. J. Deng, Q. Lu, N. Mi, H. Li, M. Liu, M. Xu, L. Tan, Q. Xie, Y. Zhang and S. Yao, *Chem. Eur. J.*, 2014, **20**, 4993.
